# Supplementary material for: Self-assembly of supramolecular chemoenzymatic poly-l-phenylalanine
Source: Royal Society of Chemistry journal article supplement (doi:10.1039/d0py01659d), 2021-01-01
Supplement: d0py01659d1.pdf [file d0py01659d1.pdf]

## SUPPORTING INFORMATION

### Self-assembly of supramolecular chemoenzymatic poly-L-Phenylalanine

*Alejandra Romero-Montero,<sup>a</sup> Isabel S. Aguirre-Díaz,<sup>a</sup> Jordi Puiggali,<sup>b</sup> Luis J. del Valle<sup>b\*</sup>,  
Miquel Gimeno<sup>a\*</sup>*

<sup>a</sup> Departamento de Alimentos y Biotecnología, Facultad de Química, Universidad Nacional Autónoma de México, 04510 CDMX, México

<sup>b</sup> Chemical Engineering Department, Escola d'Enginyeria de Barcelona Est-EEBE, c/Eduard Maristany 10-14, Barcelona, Spain

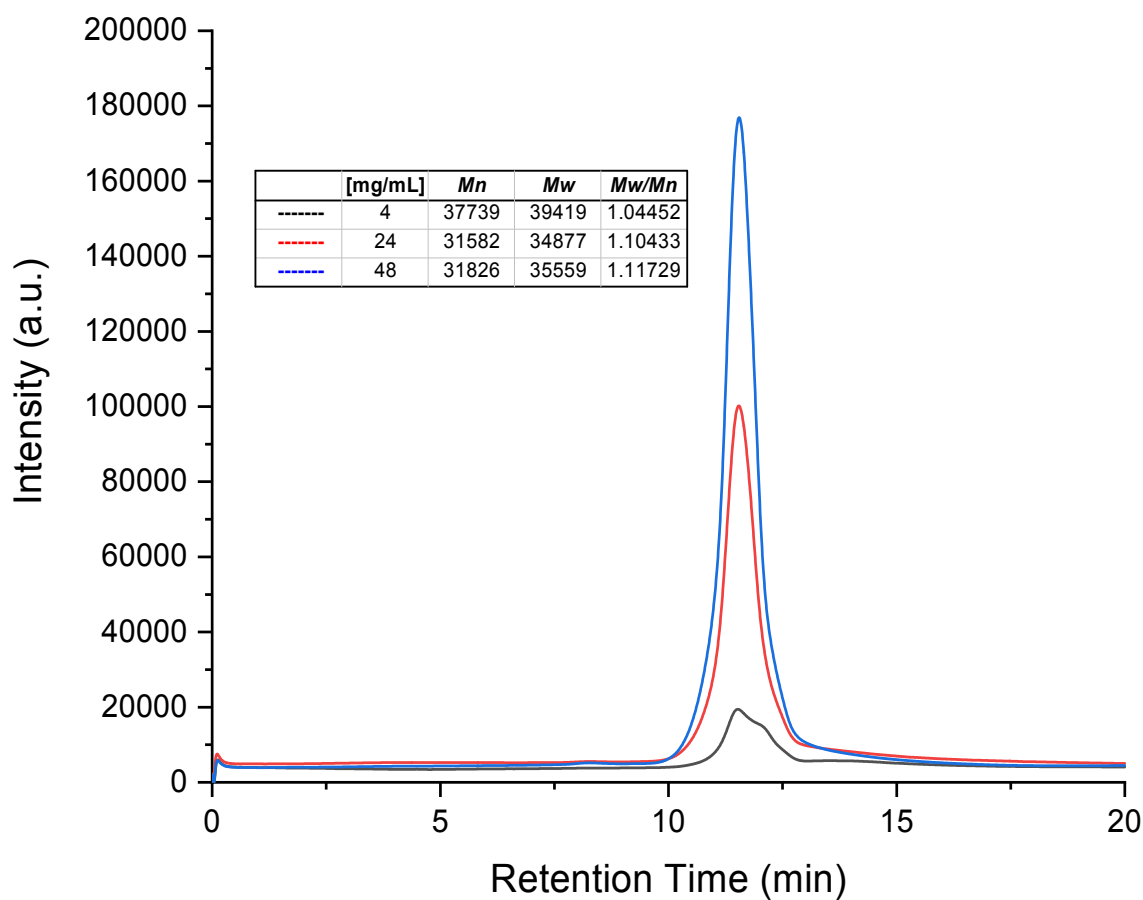

**Figure S1.** SEC traces runs from different sample concentrations against PMMA standards.

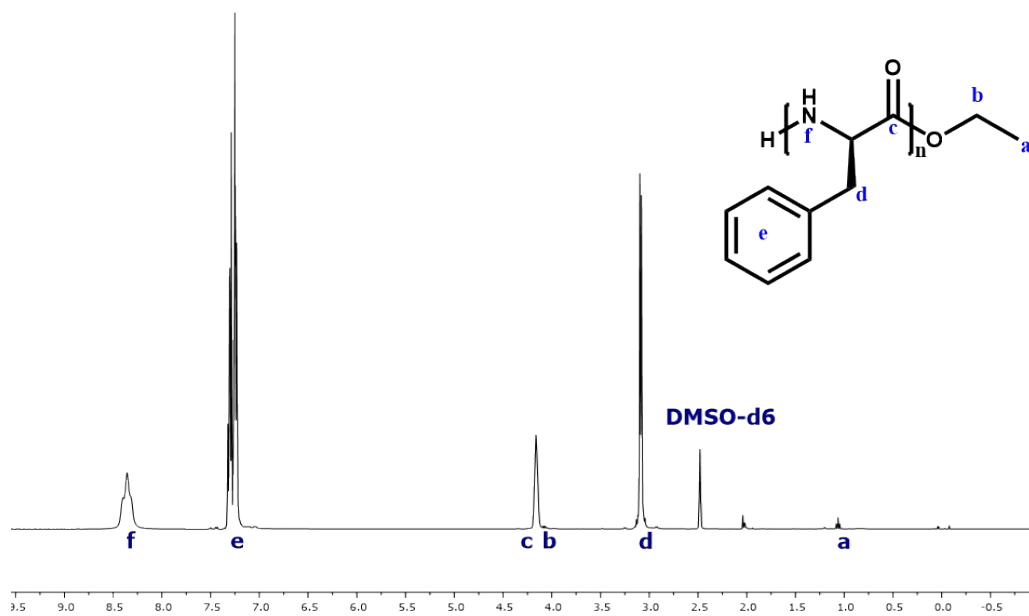

**Figure S2.** <sup>1</sup>H NMR spectra for PLP

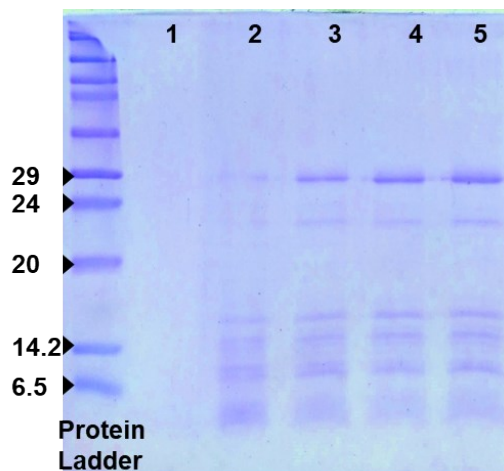

**Figure S3.** SDS-PAGE of PLP fresh solution from reactor (1), concentrated sample by nanofiltration (2-5).

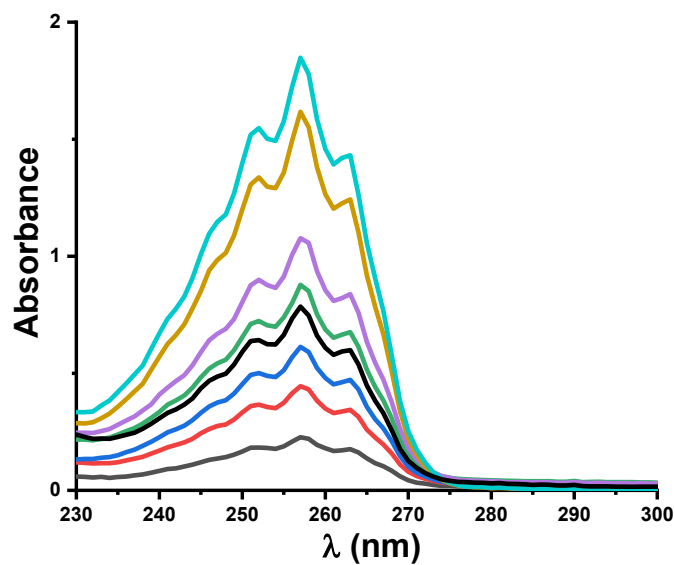

**Figure S3-1.** UV-vis absorption spectra ( $\epsilon_{257\text{ nm}} = 2.08 \times 10^4 \text{ L mol}^{-1}\text{ cm}^{-1}$ ) with different ePLP concentrations (0.2-1.8 mg/mL).

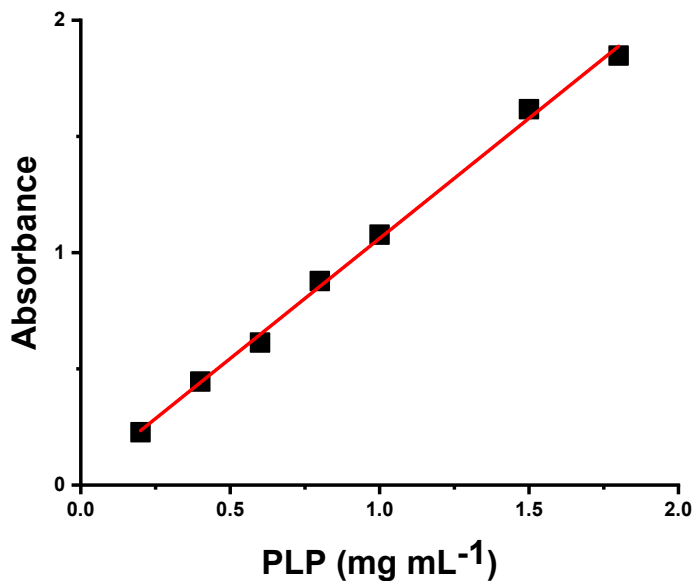

**Figure S3-2.** Calibration curve for PLP in water by UV-vis spectroscopy.

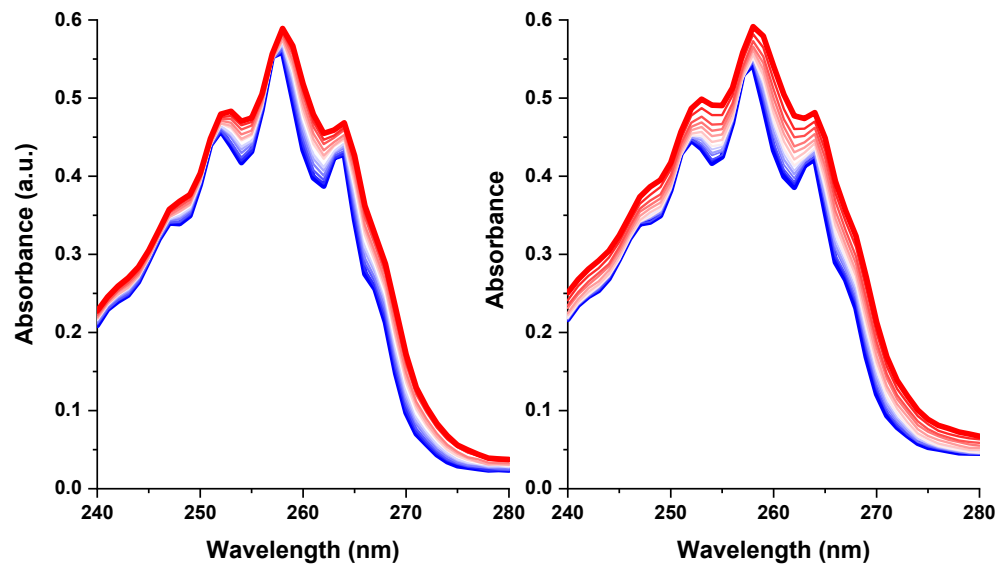

**Figure S4.** UV spectra upon heating from 25 °C (blue) to 90 °C (red) for water-solubilized (a), and urea-solubilized (b) ePLP.

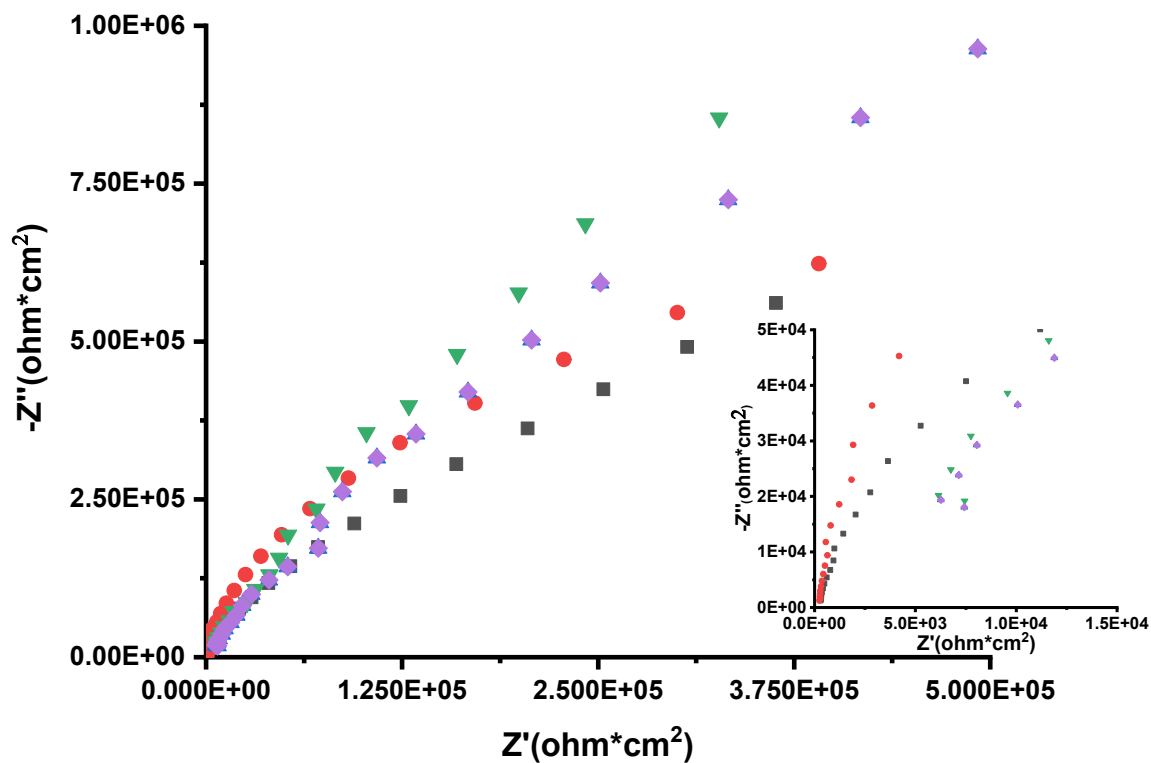

**Figure S5.** Nyquist plot of ePLP nanotubes (black and red symbols) and ePLP bulk (green and purple symbols). The inset represents a detail of the high- frequency region.

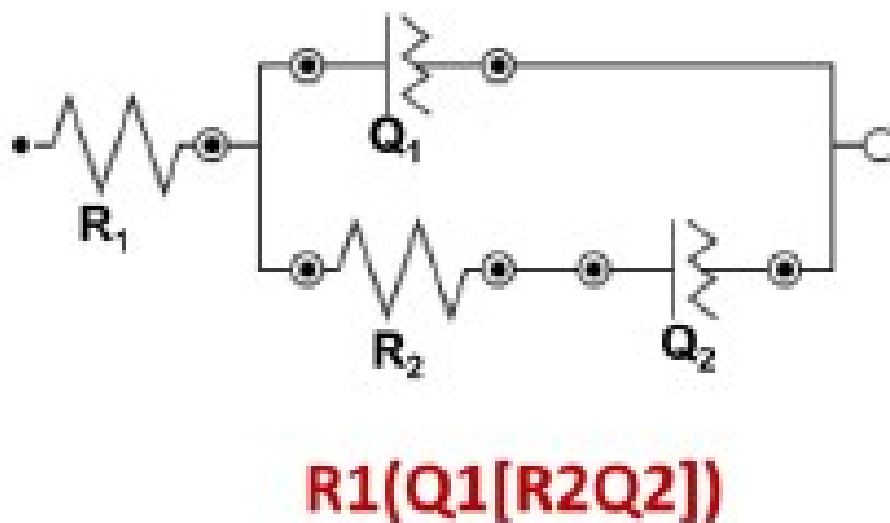

**Figure S6.** Equivalent electrical circuit

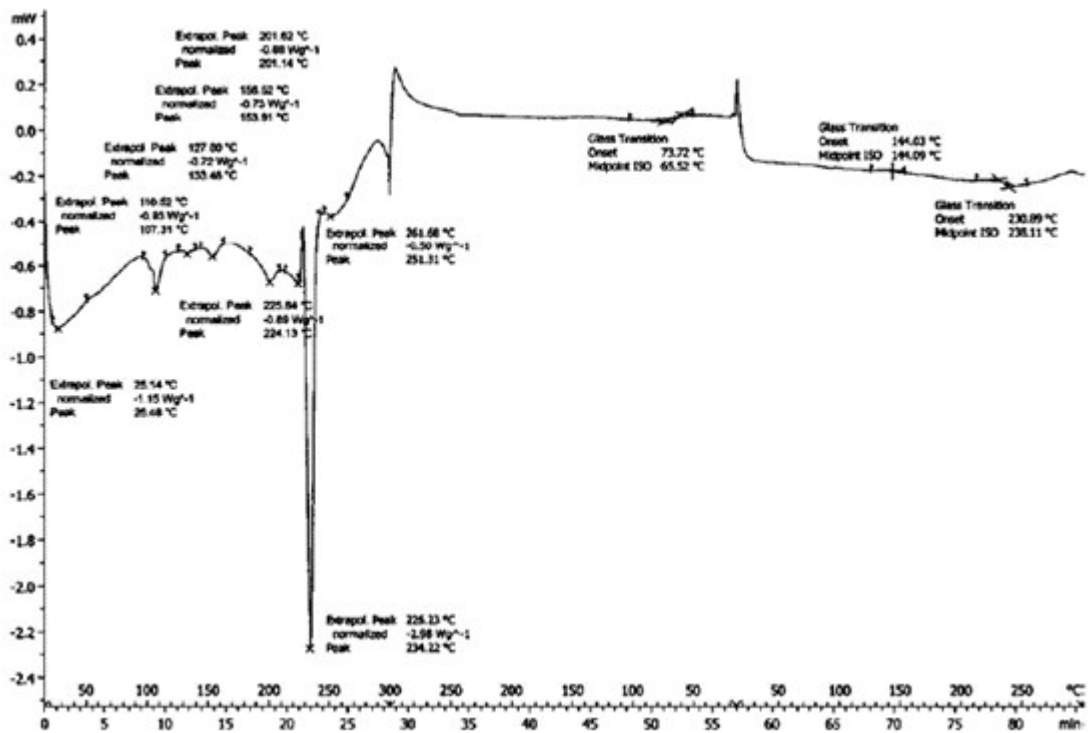

Figure S7. DSC for ePLP.

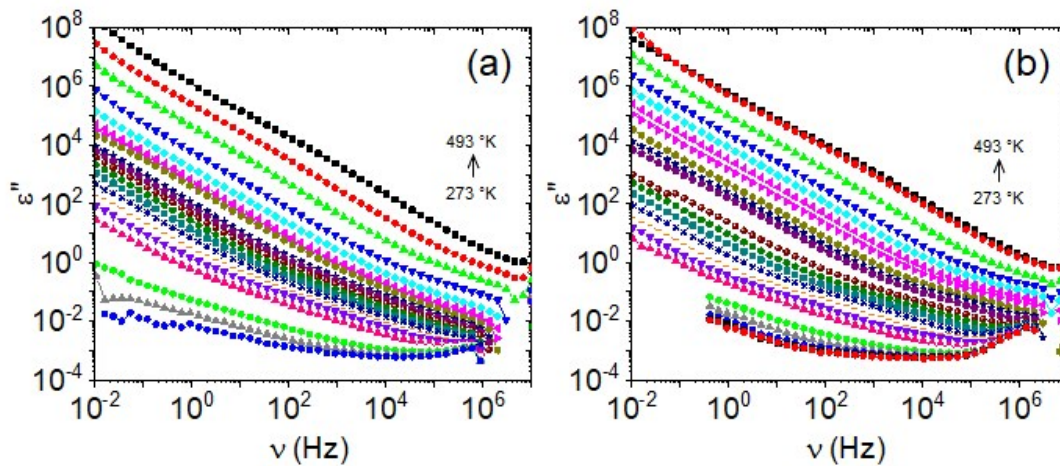

Figure S8. Imaginary part ( $\epsilon''$ ) of the dielectric constant for disordered (a) and nanotubes ePLP (b).

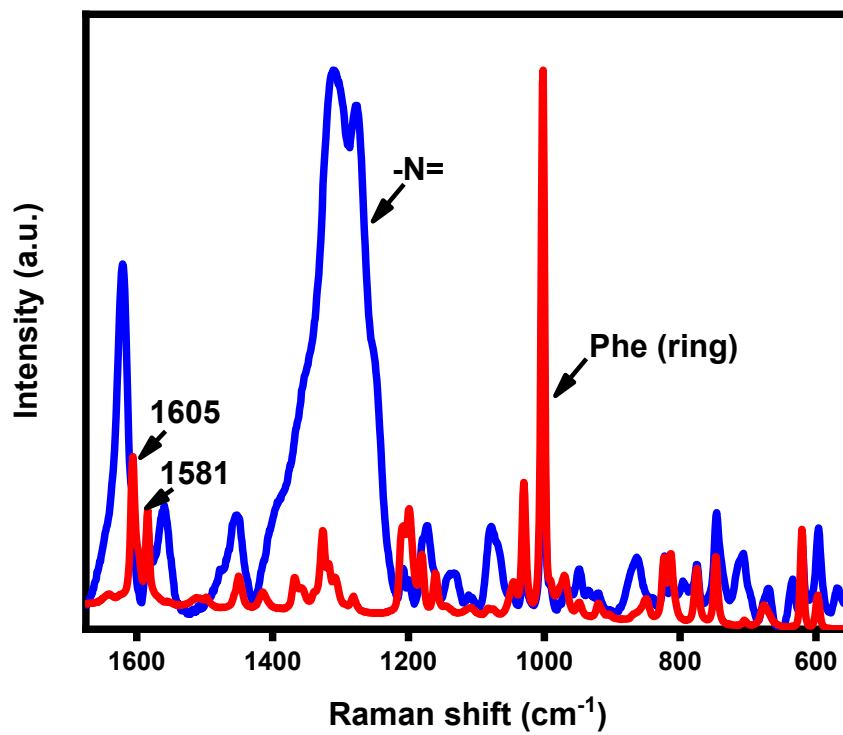

**Figure S9.** Raman spectra for PLP nanotubes (red); and TC-loaded PLP nanotubes (blue).
